# Supplementary material
Source: Research Square preprint supplement (doi:10.21203/rs.3.rs-9380480/v1)
Supplement: Supplementary file 1 [file 2c93f1ab84de096ce5f53b3b.docx]

Tabel . Socio-demographic data

|  | | Number | % |
| --- | --- | --- | --- |
| Age (y.o) | 31-40 | 10 | 8,9% |
| 41-50 | 25 | 22,3% |
| 51-60 | 60 | 53,6% |
| >60 | 17 | 15,2% |
| Education | Basic | 2 | 1,8% |
| Vocational, htechnical | 22 | 19,6% |
| General secondary | 30 | 26,8% |
| Higher first cycle (bachelor's degree) | 10 | 8,9% |
| Higher second cycle (master's degree) | 46 | 41,1% |
| No answer | 2 | 1,8% |
| Domicile | Village | 30 | 26,8% |
| Municipal town | 16 | 14,3% |
| County town | 36 | 32,1% |
| Regional town | 29 | 25,9% |
| No answer | 1 | 0,9% |
| Economic status | Low | 3 | 2,7% |
| Satisfactory | 23 | 20,5% |
| Good | 69 | 61,6% |
| Very good | 14 | 12,5% |
| No answear | 3 | 2,7% |
| Relationship status | Civil partnership | 12 | 10,7% |
| Marriage | 89 | 79,5% |
| Other | 11 | 9,8% |
| Length of the relationship (years) | <2 | 2 | 1,8% |
| 2-5 | 8 | 7,1% |
| 5-10 | 6 | 5,4% |
| >10 lat | 93 | 83,0% |
| No answear | 3 | 2,7% |
| Length of intercourse with current partner/husband  (years) | <2 l | 4 | 3,6% |
| 2-5 | 8 | 7,1% |
| 5-10 | 7 | 6,3% |
| >10 | 90 | 80,4% |
| No answear | 3 | 2,7% |
| Number of sexual partnes so far | 0 | 3 | 2,7% |
| 1-3 | 94 | 83,9% |
| 4-8 | 10 | 8,9% |
| 9-13 | 1 | 0,9% |
| No answear | 4 | 3,6% |

Abbreviation

Years of age – o.o

**Tabel 2. Psychophysical experience during the first sexual intercourse after gynecological procedure. Possibility of multiple responses**

|  | Number | % |
| --- | --- | --- |
| insufficient or no vaginal lubrication | 49 | 43,8% |
| Fear | 47 | 42,0% |
| Lack of arousal | 29 | 25,9% |
| Reluctance to have intercourse | 19 | 17,0% |
| Excitement: I couldn't wait | 1 | 0,9% |
| Other | 3 | 2,7% |
| No response | 26 | 23,2% |

**Tabel 3. Menopause symptoms experienced by the patients. Multiple responses possible**

|  | Number | % |
| --- | --- | --- |
| Hot flashes | 61 | 54,5% |
| Vaginal dryness, irritation, burning, itching | 38 | 33,9% |
| Sleep disturbances, waking up at night, difficulty falling asleep | 38 | 33,9% |
| Increased sweating | 37 | 33,0% |
| Weakened concentration and memory | 32 | 28,6% |
| Weight gain | 30 | 26,8% |
| Mood disorders | 25 | 22,3% |
| Muscle and joint pain | 22 | 19,6% |
| Increased urinary incontinence | 18 | 16,1% |
| Heart palpitations | 17 | 15,2% |
| General weakness | 15 | 13,4% |
| Dizziness and headaches | 14 | 12,5% |
| More frequent infections of the external genitalia | 10 | 8,9% |
| Redness, burning sensation on the skin | 3 | 2,7% |
| Not applicable | 45 | 40,2% |

Tabel 4. Mood disorders experienced by the patients. Multiple responses possible

|  | Number | % |
| --- | --- | --- |
| Irritability | 19 | 17,1% |
| Nervousness | 18 | 16,2% |
| Sadness | 15 | 13,5% |
| Tearfulness | 9 | 8,1% |
| Depression | 6 | 5,4% |
| Anxiety | 4 | 3,6% |
| No applicable | 86 | 77,5% |

**Tabel 5. The worst, most severe symptom/condition after gynecological surgery**

|  | Number | % |
| --- | --- | --- |
| Urinary incontinence | 10 | 8,9 |
| Heavy sweating, hot flashes | 7 | 6,3 |
| Pain during intercourse | 6 | 5,4 |
| Severe symptoms of menopause | 4 | 3,6 |
| Pain after surgery | 4 | 3,6 |
| Decreased well-being | 4 | 3,6 |
| Vaginal dryness | 4 | 3,6 |
| Inability to get pregnant | 3 | 2,7 |
| Feeling of loss of femininity | 3 | 2,7 |
| Weight gain | 3 | 2,7 |
| Scar | 2 | 1,8 |
| Decreased libido | 2 | 1,8 |
| Low sexual attractiveness in the eyes of the partner | 2 | 1,8 |
| Convalescence | 2 | 1,8 |
| Problems with defecation | 2 | 1,8 |
| Insomnia | 2 | 1,8 |
| Condition before gynecological surgery | 2 | 1,8 |
| Diabetes | 1 | 0,9 |
| Vaginal inflammation | 1 | 0,9 |
| Bleeding during sex | 1 | 0,9 |
| Lower physical efficiency | 1 | 0,9 |
| Fear of disease recurrence | 1 | 0,9 |
| No symptoms | 2 | 1,8 |
| No response | 43 | 38,4 |
